# Supplementary material
Source: PubMed Central journal article supplement (PMC4082997)
Supplement: NIHMS576700-supplement-jne480770supp_pdf.pdf [file NIHMS576700-supplement-jne480770supp_pdf.pdf]

### Supplementary Material

|          | 0.5 ms                        |                               |                        |               | 4 ms                   |               |                                 |                               |                               |               |
|----------|-------------------------------|-------------------------------|------------------------|---------------|------------------------|---------------|---------------------------------|-------------------------------|-------------------------------|---------------|
|          | <i>Epiretinal</i> ( $\mu A$ ) |                               | <i>IPL</i> ( $\mu A$ ) |               | <i>IPL</i> ( $\mu A$ ) |               | <i>OPL</i> ( $\mu A$ )          |                               | <i>Subretinal</i> ( $\mu A$ ) |               |
|          | Direct                        | Network                       | Direct                 | Network       | Direct                 | Network       | Direct                          | Network                       | Direct                        | Network       |
| Anodic   | 10 $\pm$ 5.6                  | 21 $\pm$ 12                   | 7.6 $\pm$ 3.9          | 14 $\pm$ 8    | 3.0 $\pm$ 1.5          | 3.2 $\pm$ 1.8 | <b>3.0 <math>\pm</math> 1.8</b> | <b>1.3<math>\pm</math>0.6</b> | 4.0 $\pm$ 1.7                 | 2.9 $\pm$ 1.8 |
| Cathodic | <b>2.4<math>\pm</math>1.4</b> | <b>7.2<math>\pm</math>4.3</b> | 5.3 $\pm$ 3.1          | 8.2 $\pm$ 5.4 | 2.1 $\pm$ 1.2          | 1.9 $\pm$ 1.2 | 4.0 $\pm$ 1.9                   | 3.2 $\pm$ 2.1                 | 23 $\pm$ 11                   | 25 $\pm$ 13   |

Table 1. Thresholds of the direct and network-mediated (ML) responses with anodic and cathodic stimuli and electrodes located in epiretinal, IPL, OPL and subretinal positions. 0.5 ms pulses were used for targeting direct stimulation of RGCs: Optimum configuration for direct stimulation (epiretinal cathodic) is outlined with red. 4 ms pulses were used for targeting network-mediated stimulation in IPL, OPL and subretinal positions. Optimum configuration for network stimulation (OPL anodic) is outlined with red.
